# Supplementary material
Source: PubMed Central journal article supplement (PMC6200338)
Supplement: NIHMS1507442-supplement-Supp7.pdf [file NIHMS1507442-supplement-Supp7.pdf]

5' **CACCG**NNNNNNNNNNNNNNNNNNNNNN**CGAA**NNNNNNNNNNNNNNNNNNNNNC  
 target sense sequence (19-21nt)      loop (4-15nt)      target anti-sense sequence (19-21nt)  
 +

5' **AAAAG**NNNNNNNNNNNNNNNNNNNNNN**TTCG**NNNNNNNNNNNNNNNNNNNNNC

reverse complement of top oligo

Anneal -> ds oligo

5' **CACCG**NNNNNNNNNNNNNNNNNNNNNN**CGAA**NNNNNNNNNNNNNNNNNNNNNC  
 pENTR cloning overhang      pENTR cloning overhang  
**C**NNNNNNNNNNNNNNNNNNNNNN**GCTT**NNNNNNNNNNNNNNNNNNNNNG**AAAA** 5'

Clone into pENTR/U6 vector

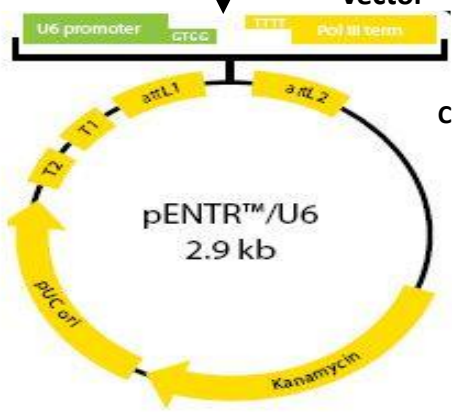

Clone into shuttle vector, 293FT transfection for shRNA lentivirus production

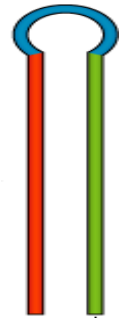

shRNA production within ASCs

siRNA processing

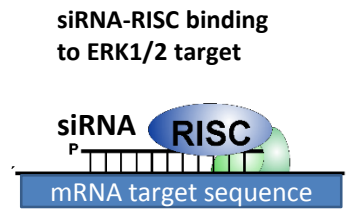

SILENCING

Supplemental Figure S7:
