# Supplementary material
Source: PubMed Central journal article supplement (PMC6200338)

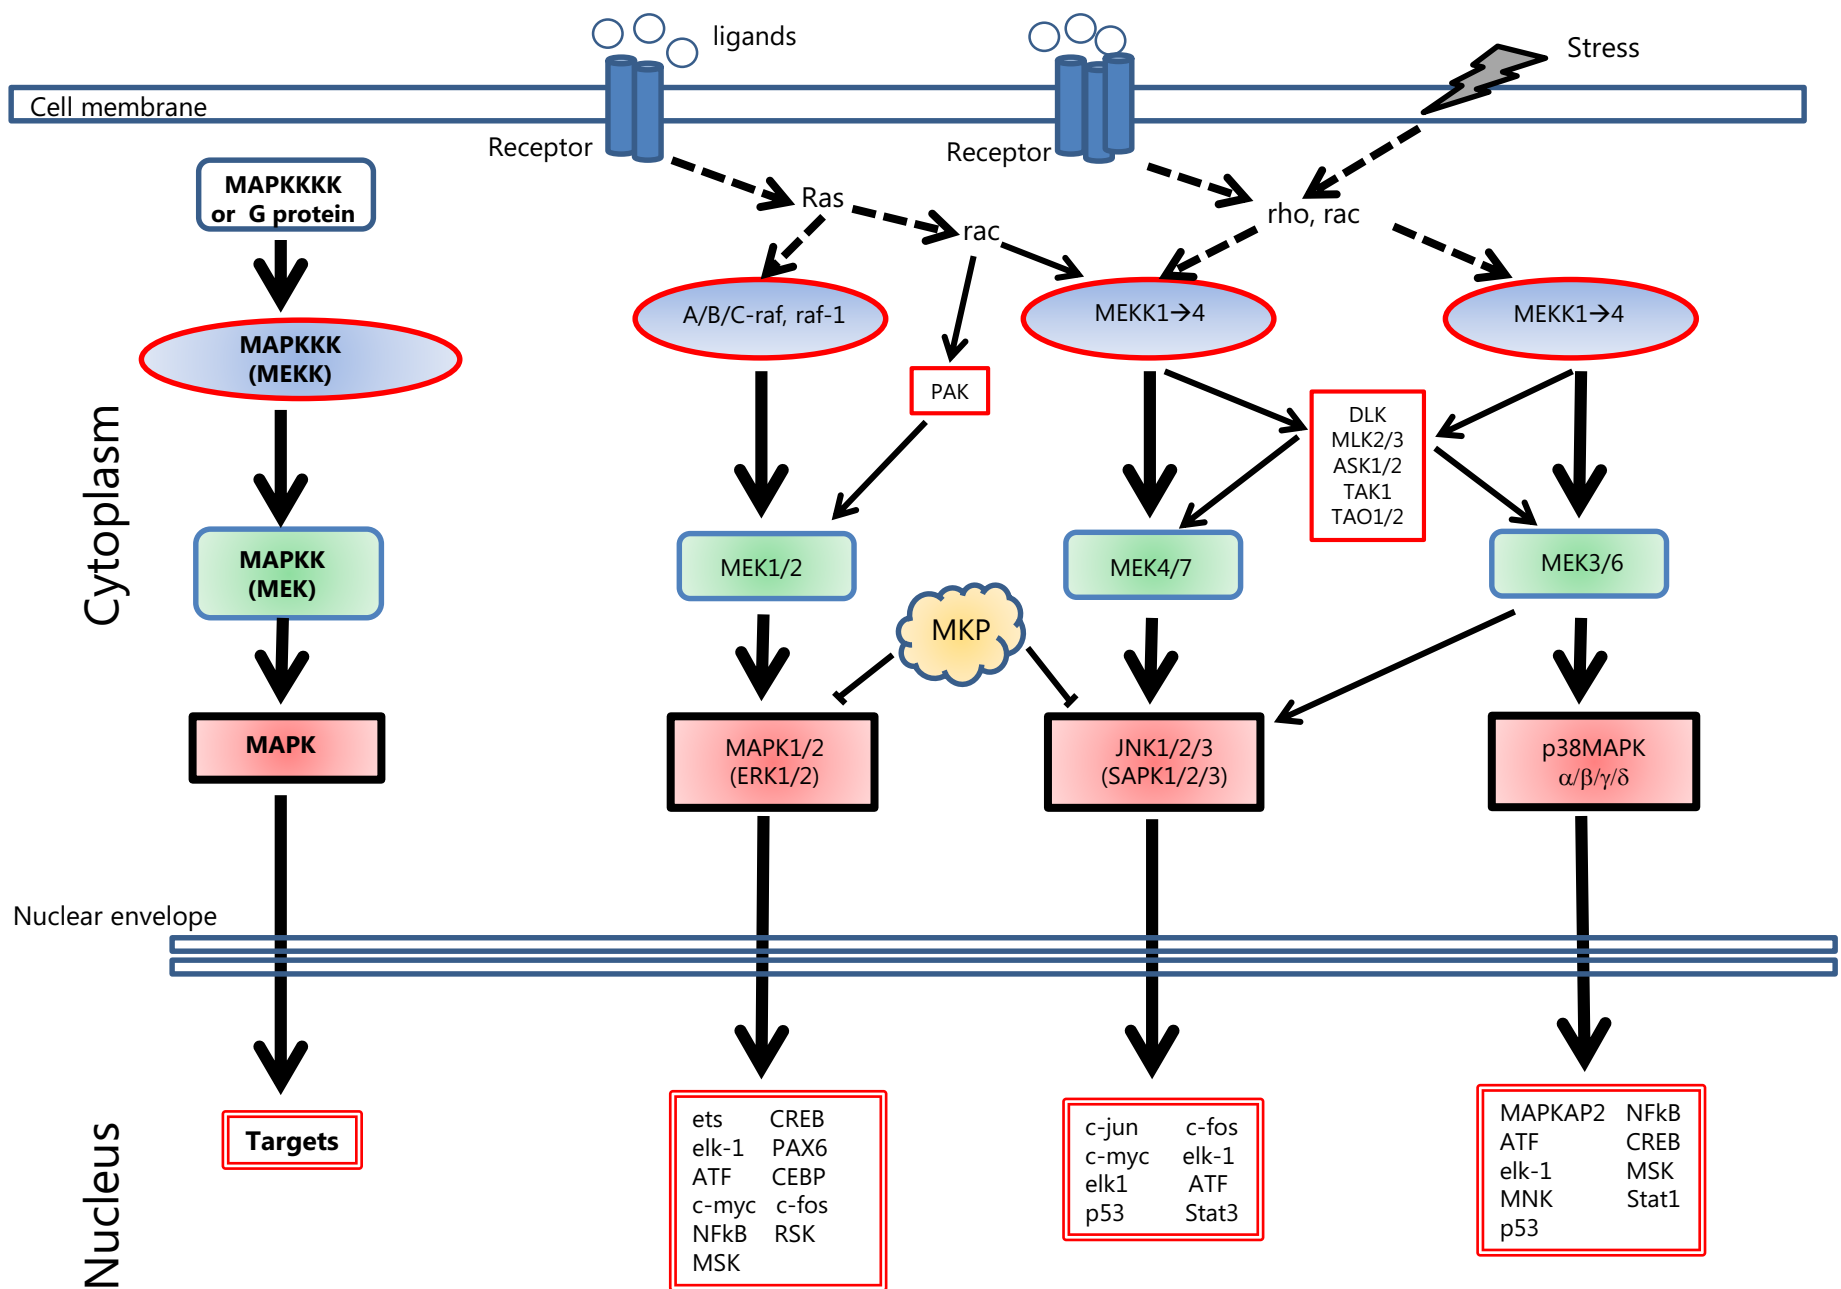

Supplemental Figure S1:

Supplement: NIHMS1507442-supplement-Supp1.pdf [file NIHMS1507442-supplement-Supp1.pdf]

**A.**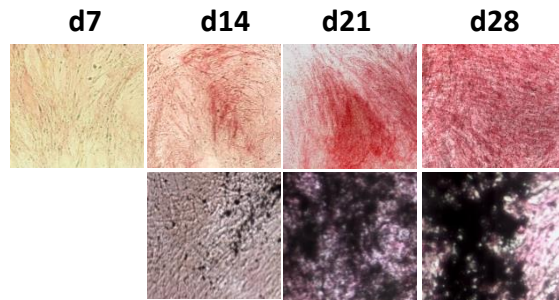**B.**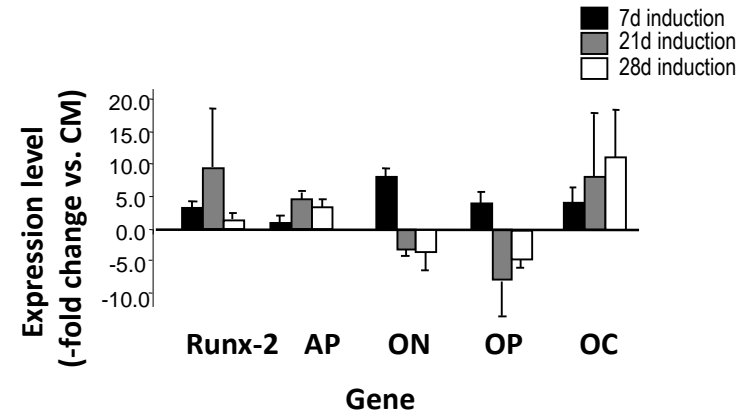**C.**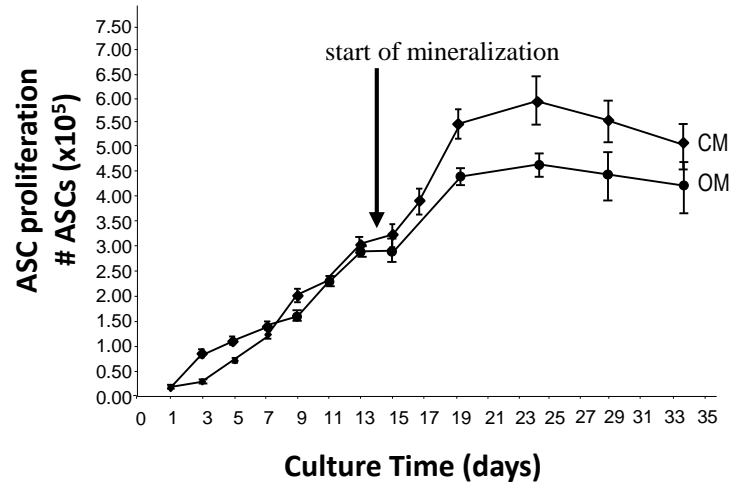**D.**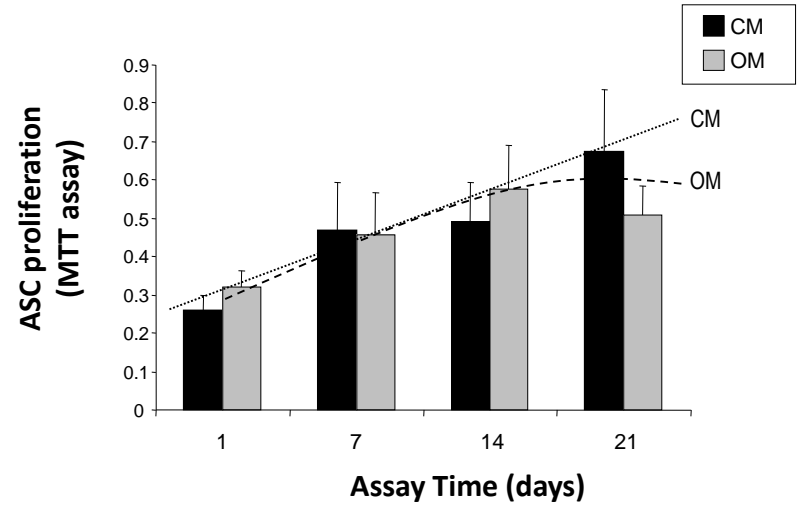

Supplement: NIHMS1507442-supplement-Supp2.pdf [file NIHMS1507442-supplement-Supp2.pdf]

**A.**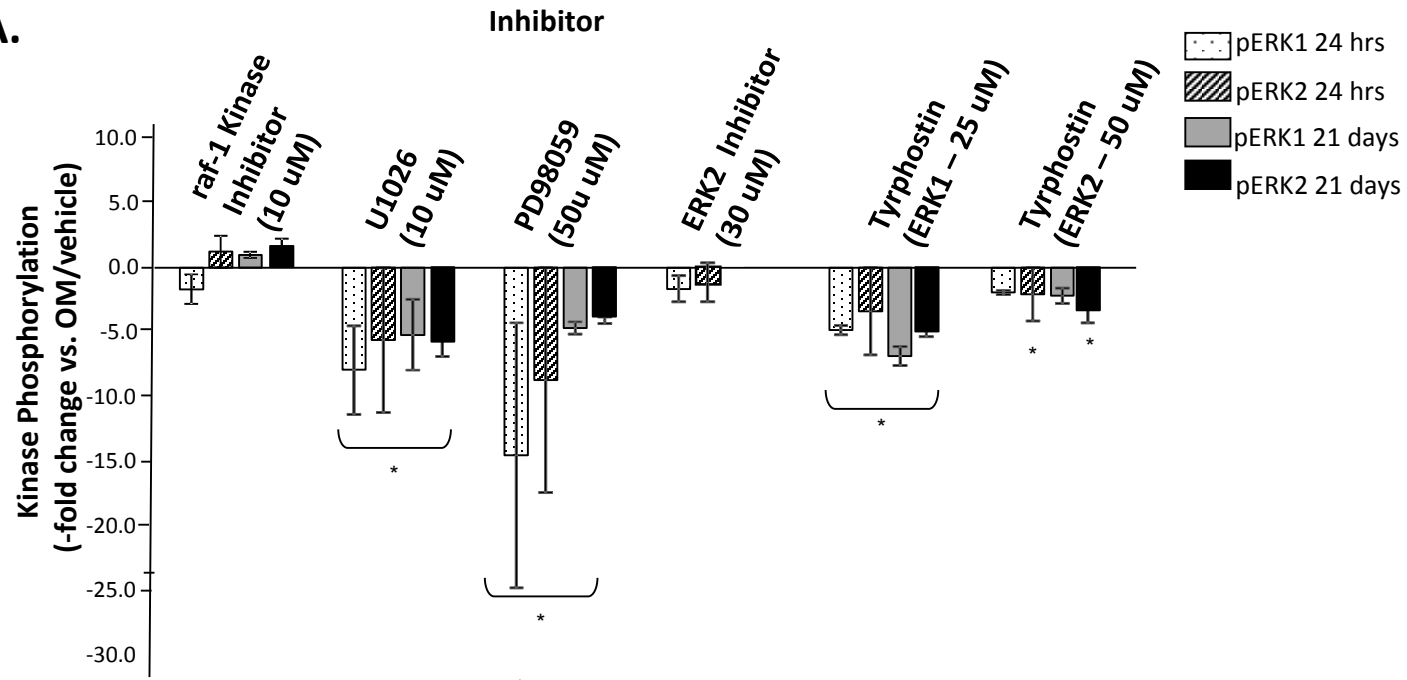**B.**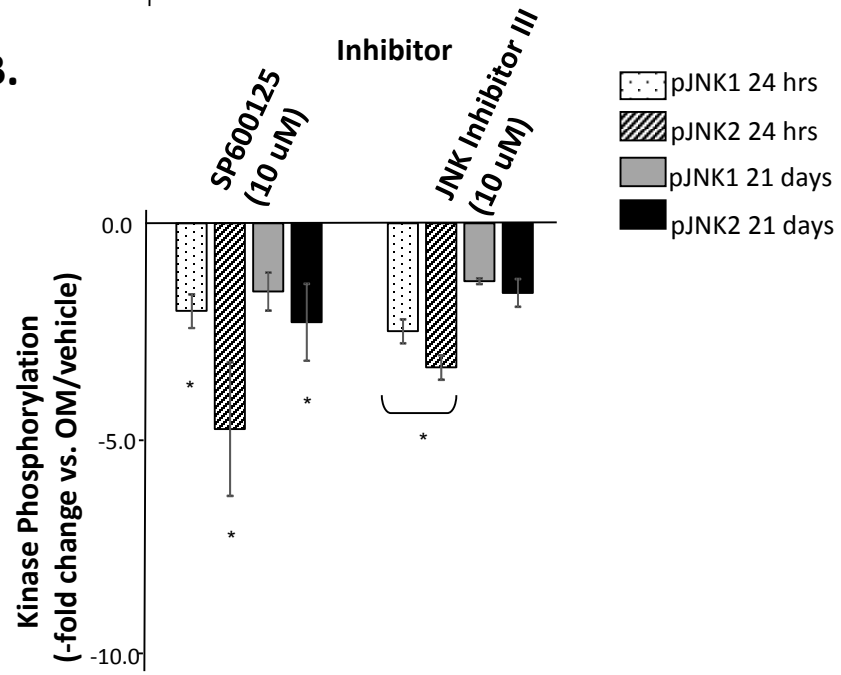**C.**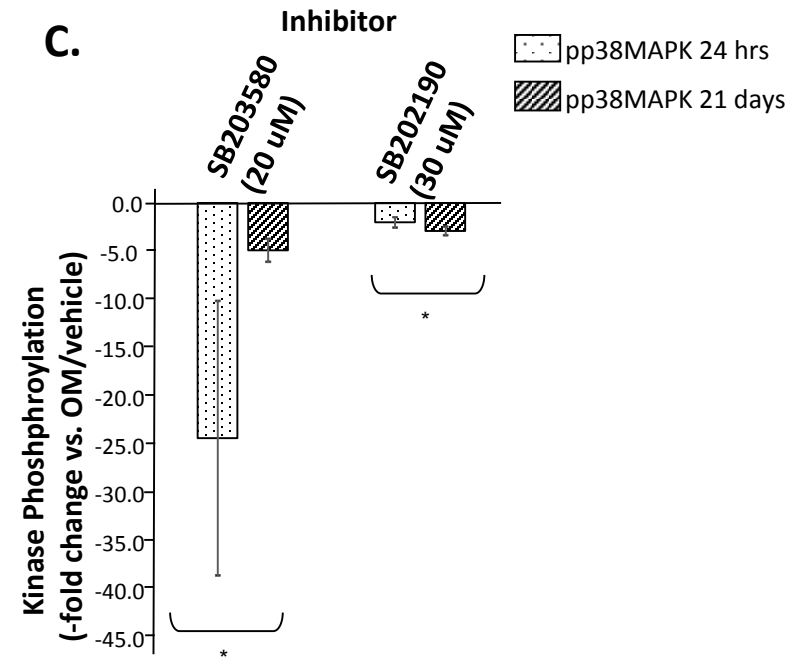

Supplement: NIHMS1507442-supplement-Supp3.pdf [file NIHMS1507442-supplement-Supp3.pdf]

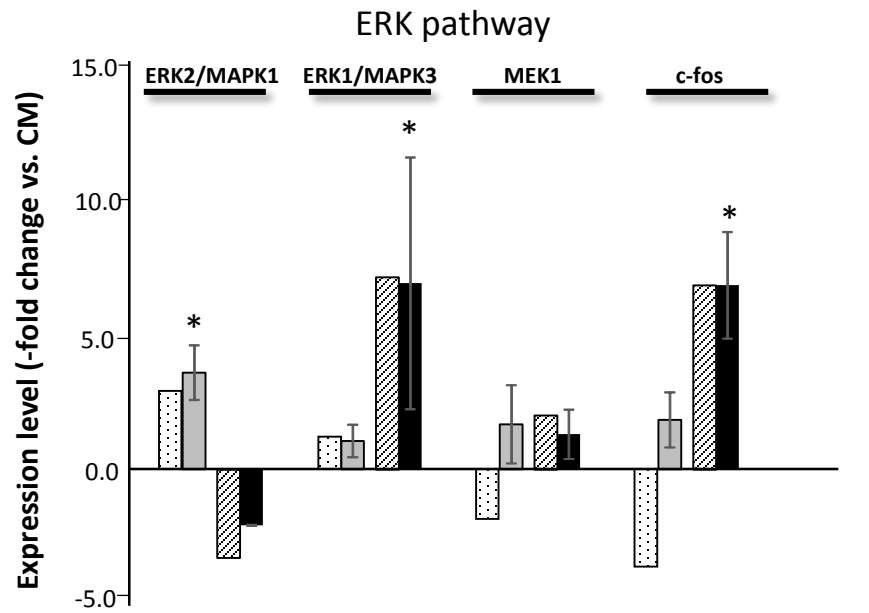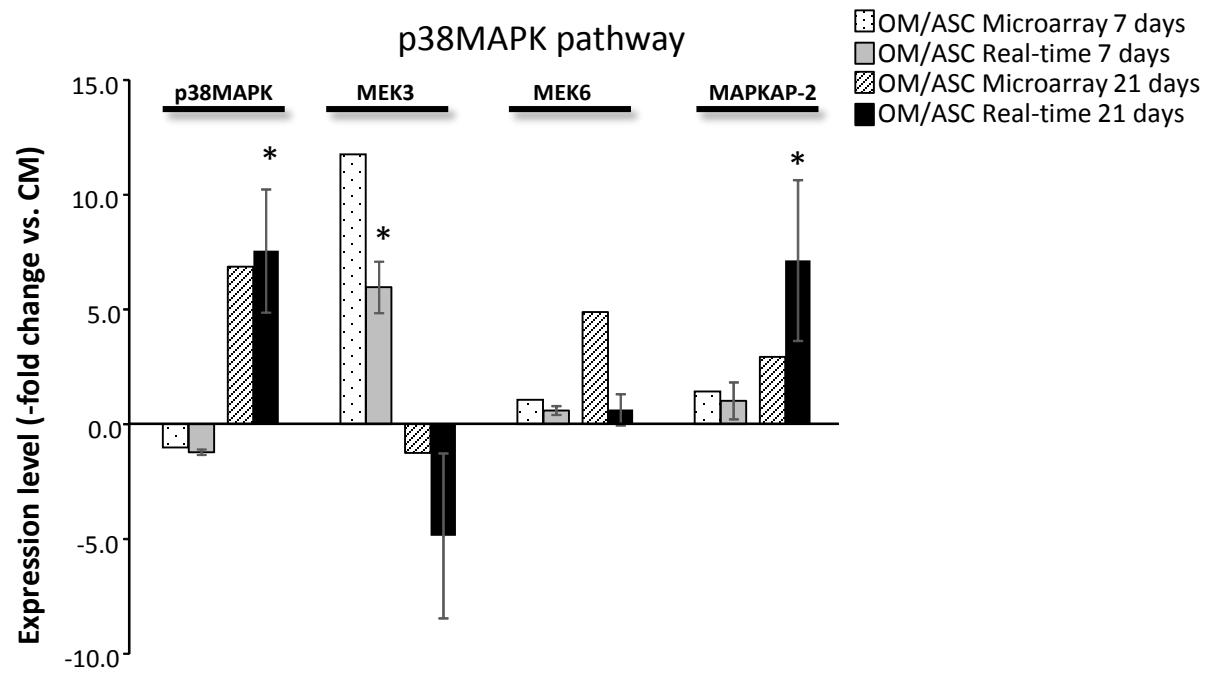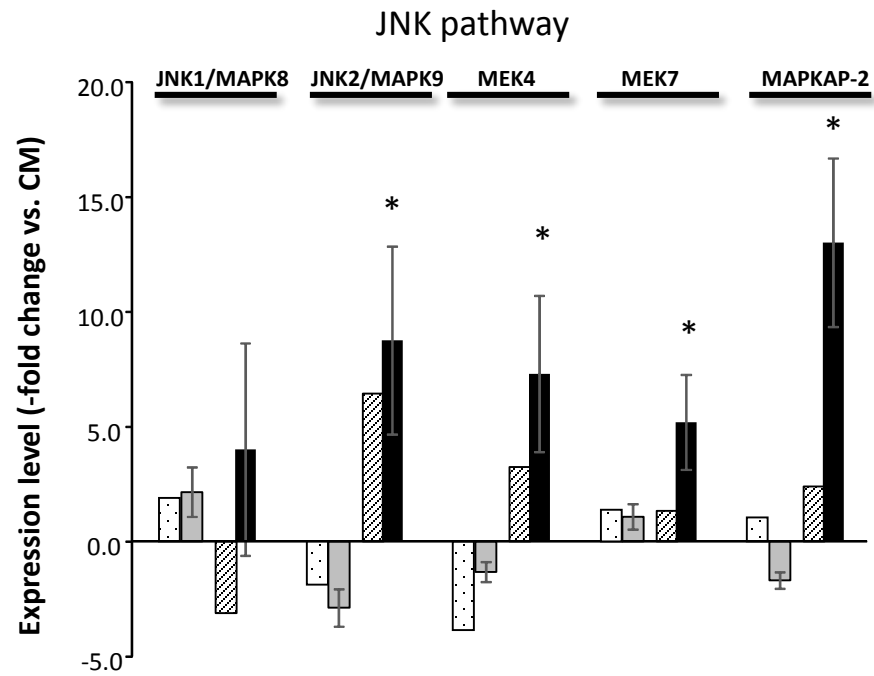

Supplemental Figure S4:

Supplement: NIHMS1507442-supplement-Supp4.pdf [file NIHMS1507442-supplement-Supp4.pdf]

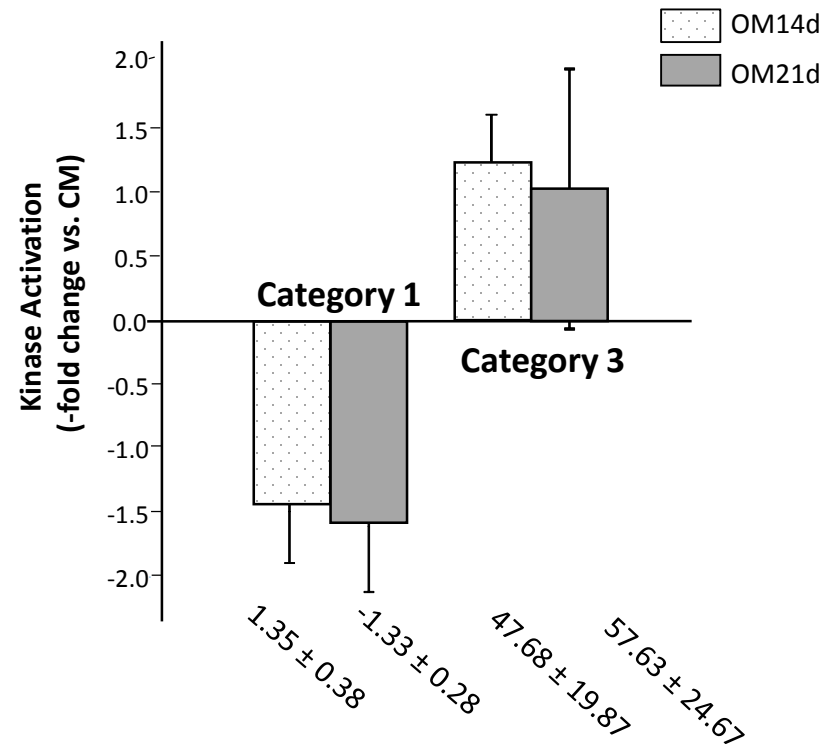

Supplemental Figure S5:

Supplement: NIHMS1507442-supplement-Supp5.pdf [file NIHMS1507442-supplement-Supp5.pdf]

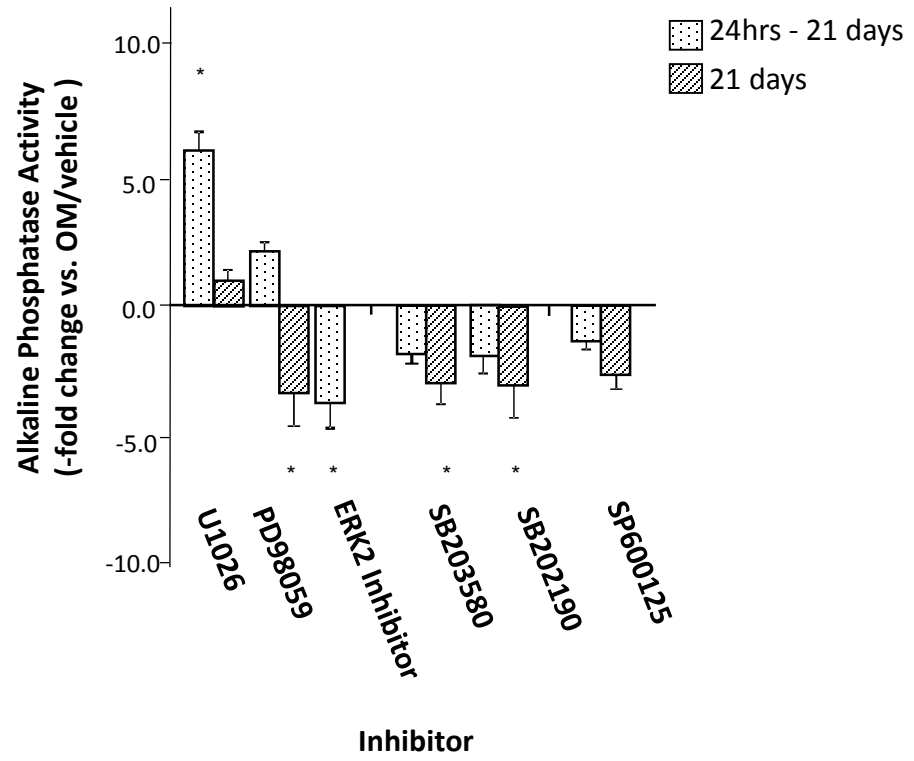

Supplemental Figure S6:

Supplement: NIHMS1507442-supplement-Supp6.pdf [file NIHMS1507442-supplement-Supp6.pdf]
